# Supplementary material for: Pathogenicity and selective constraint on variation near splice sites
Source: PubMed Central journal article supplement (PMC6360807; doi:10.1101/gr.238444.118), 2019-02
Supplement: supp_gr.238444.118_Supplemental_Table_S4.pdf [file supp_gr.238444.118_Supplemental_Table_S4.pdf]

| <b>Dominant DD genes</b> | <b>Recessive DD genes</b> | <b>Additional genes removed from non-DD class</b> | <b>Mode of inheritance</b> |
|--------------------------|---------------------------|---------------------------------------------------|----------------------------|
| CRYAA                    | RMRP                      | SMCHD1                                            | Digenic                    |
| FBN1                     | ABHD5                     | MTMR14                                            | Digenic                    |
| CYP1B1                   | CRYAB                     | NHS                                               | Hemizygous                 |
| RET                      | ALX1                      | PQBP1                                             | Hemizygous                 |
| HESX1                    | RECQL4                    | ACSL4                                             | Hemizygous                 |
| GJB3                     | CRYBB3                    | AFF2                                              | Hemizygous                 |
| IGF1R                    | CYP1B1                    | MAOA                                              | Hemizygous                 |
| ADAR                     | GFER                      | AP1S2                                             | Hemizygous                 |
| MIR184                   | GALK1                     | ARHGEF6                                           | Hemizygous                 |
| MIR96                    | FAM126A                   | ARX                                               | Hemizygous                 |
| JAG1                     | LTBP2                     | ATRX                                              | Hemizygous                 |
| MIR17HG                  | POMGNT1                   | BRWD3                                             | Hemizygous                 |
| FGFR1                    | PRSS56                    | CUL4B                                             | Hemizygous                 |
| CRYBA1                   | RAX                       | DCX                                               | Hemizygous                 |
| CRYBA4                   | CTDP1                     | DLG3                                              | Hemizygous                 |
| CRYBB2                   | STRA6                     | DMD                                               | Hemizygous                 |
| COL2A1                   | TDRD7                     | FGD1                                              | Hemizygous                 |
| EYA1                     | GLIS3                     | FMR1                                              | Hemizygous                 |
| FTL                      | FOXE3                     | GDI1                                              | Hemizygous                 |
| FOXC1                    | GJA1                      | GRIA3                                             | Hemizygous                 |
| FOXE3                    | ACOX1                     | HSD17B10                                          | Hemizygous                 |
| CRYGC                    | AGPS                      | HPRT1                                             | Hemizygous                 |
| CRYGD                    | ALDH3A2                   | HUWE1                                             | Hemizygous                 |
| GJA3                     | ALDH4A1                   | IDS                                               | Hemizygous                 |
| GDF6                     | ALX3                      | IQSEC2                                            | Hemizygous                 |
| HSF4                     | AP4M1                     | IL1RAPL1                                          | Hemizygous                 |
| SIX6                     | ARG1                      | KIAA2022                                          | Hemizygous                 |
| MITF                     | ARL6                      | KDM5C                                             | Hemizygous                 |
| MYH9                     | SMPD1                     | RPS6KA3                                           | Hemizygous                 |
| DMPK                     | AGA                       | L1CAM                                             | Hemizygous                 |
| BFSP2                    | ATR                       | LAMP2                                             | Hemizygous                 |
| PITX2                    | TAT                       | MAGT1                                             | Hemizygous                 |
| SNX3                     | B4GALT7                   | MAMLD1                                            | Hemizygous                 |
| SOX2                     | BBS10                     | MED12                                             | Hemizygous                 |
| TMEM114                  | BBS12                     | PLP1                                              | Hemizygous                 |
| ZEB2                     | BBS1                      | NLGN4X                                            | Hemizygous                 |
| CRYAB                    | BBS2                      | OPHN1                                             | Hemizygous                 |
| GJA1                     | BBS4                      | PAK3                                              | Hemizygous                 |
| MYOC                     | BBS5                      | PGK1                                              | Hemizygous                 |
| CHRNA4                   | BBS7                      | PHF6                                              | Hemizygous                 |
| BPIFB6                   | CC2D1A                    | PHF8                                              | Hemizygous                 |
| BRAF                     | CA2                       | PRPS1                                             | Hemizygous                 |
| CDH15                    | CA8                       | RAB39B                                            | Hemizygous                 |
| CREBBP                   | COA5                      | UPF3B                                             | Hemizygous                 |
| HSPD1                    | CBS                       | ATP6AP2                                           | Hemizygous                 |
| CIC                      | CCBE1                     | FTSJ1                                             | Hemizygous                 |

|          |         |         |            |
|----------|---------|---------|------------|
| DEAF1    | CEP152  | SLC6A8  | Hemizygous |
| DYNC1H1  | CEP290  | SLC9A6  | Hemizygous |
| EHMT1    | CENPJ   | SMS     | Hemizygous |
| EP300    | CLN8    | SRPX2   | Hemizygous |
| EXT1     | CNTNAP2 | SYP     | Hemizygous |
| FBXO25   | COX10   | TSPAN7  | Hemizygous |
| FBXW4    | COX15   | ZDHHC9  | Hemizygous |
| FGFR2    | CPS1    | ZNF711  | Hemizygous |
| FGFR3    | CRBN    | CASK    | Hemizygous |
| FOXF1    | COX6B1  | FLNA    | Hemizygous |
| FOXG1    | DAG1    | MECP2   | Hemizygous |
| FOXP1    | DCAF17  | NSDHL   | Hemizygous |
| GATA4    | GAD1    | OFD1    | Hemizygous |
| GLMN     | DHCR7   | SOX3    | Hemizygous |
| SLC2A1   | DLL3    | GPC3    | Hemizygous |
| HDAC4    | DYM     | FRMD7   | Hemizygous |
| HNF1B    | EIF2AK3 | CHRD1   | Hemizygous |
| HOXD13   | ERCC2   | PIGA    | Hemizygous |
| TCF4     | ERCC3   | RBM10   | Hemizygous |
| KCNC3    | ERCC5   | ATP7A   | Hemizygous |
| KCNQ2    | ERCC6   | SRY     | Hemizygous |
| KIRREL3  | ERCC8   | TRAPPC2 | Hemizygous |
| KRIT1    | ESCO2   | FHL1    | Hemizygous |
| PAFAH1B1 | FKRP    | NDP     | Hemizygous |
| LMNA     | FKTN    | TIMM8A  | Hemizygous |
| MED13L   | FRAS1   | EDA     | Hemizygous |
| MEF2C    | FREM2   | ABCB7   | Hemizygous |
| MAPK10   | WDPCP   | ABCD1   | Hemizygous |
| MLL2     | FTCD    | AGTR2   | Hemizygous |
| MNX1     | SLC35C1 | AIFM1   | Hemizygous |
| MAP2K1   | GALE    | AR      | Hemizygous |
| MAP2K2   | GALT    | ARHGEF9 | Hemizygous |
| MYH3     | GAMT    | ARSE    | Hemizygous |
| MYH6     | GATM    | CHM     | Hemizygous |
| NF1      | GCH1    | DKC1    | Hemizygous |
| NIPBL    | GDF5    | FANCB   | Hemizygous |
| NKX2-5   | GLUL    | FOXP3   | Hemizygous |
| NOG      | GNPAT   | GK      | Hemizygous |
| NSD1     | GNPTAB  | MID1    | Hemizygous |
| TP63     | GNPTG   | NAA10   | Hemizygous |
| PAX8     | GRIK2   | NDUFA1  | Hemizygous |
| PDCD10   | HPD     | NLGN3   | Hemizygous |
| PTEN     | UROC1   | OTC     | Hemizygous |
| RAI1     | HOXA1   | PTCHD1  | Hemizygous |
| RASA1    | HYLS1   | SLC16A2 | Hemizygous |
| HRAS     | IDUA    | STS     | Hemizygous |
| KRAS     | IGF1    | SYN1    | Hemizygous |
| SALL1    | CHUK    | TAZ     | Hemizygous |
| SATB2    | INPP5E  | TBX22   | Hemizygous |
| SETBP1   | KCNJ10  | UBE2A   | Hemizygous |

|         |          |         |                  |
|---------|----------|---------|------------------|
| SHANK2  | KIAA1279 | ZIC3    | Hemizygous       |
| SLC9A9  | KCTD7    | IGBP1   | Hemizygous       |
| SMAD4   | L2HGDH   | OCRL    | Hemizygous       |
| SMC3    | LARGE    | NYX     | Hemizygous       |
| SPTAN1  | LFNG     | CCDC22  | Hemizygous       |
| STXBP1  | LRP4     | GSPT2   | Hemizygous       |
| SYNGAP1 | MAN2B1   | MTM1    | Hemizygous       |
| TUBA1A  | MANBA    | HCFC1   | Hemizygous       |
| TUBB2B  | MCPH1    | IGSF1   | Hemizygous       |
| TBX20   | MESP2    | ZC4H2   | Hemizygous       |
| TBX5    | MTR      | KIF4A   | Hemizygous       |
| TGFBR1  | MGAT2    | HDAC8   | Hemizygous       |
| TLL1    | MKKS     | ALG13   | Hemizygous       |
| TRPS1   | MKS1     | BCAP31  | Hemizygous       |
| TSC1    | MLC1     | USP9X   | Hemizygous       |
| TSC2    | MMADHC   | CNKSR2  | Hemizygous       |
| YY1     | MTHFR    | KANK1   | Imprinted        |
| VANGL1  | MYO5A    | KCNK9   | Imprinted        |
| ZNF599  | NAGA     | CDKN1C  | Imprinted        |
| GCH1    | PRSS12   | IGF2    | Imprinted        |
| GDF5    | NEU1     | UBE3A   | Imprinted        |
| HPD     | NTRK1    | MAGEL2  | Imprinted        |
| PTCH1   | NUP62    | MTTP    | Mitochondrial    |
| KIT     | SLC25A15 | AKT1    | Mosaic           |
| SMARCB1 | ALDH18A1 | PIK3CA  | Mosaic           |
| TSHR    | SLC46A1  | AKT3    | Mosaic           |
| GNAS    | PEPD     | SLC35A2 | Mosaic           |
| SMARCA2 | PEX10    | SRGAP3  | Uncertain        |
| GATA6   | PEX13    | ZDHHC15 | Uncertain        |
| WT1     | PEX1     | AXIN1   | Uncertain        |
| ACTB    | PEX26    | BCOR    | X-linked domina  |
| ACTG1   | PEX2     | CDKL5   | X-linked domina  |
| GATA2   | PEX5     | SMC1A   | X-linked domina  |
| ASXL1   | PEX7     | KDM6A   | X-linked domina  |
| NOTCH2  | PAH      | EBP     | X-linked domina  |
| GRIN2A  | PIGV     | HCCS    | X-linked domina  |
| GRIN2B  | POMT1    | PORCN   | X-linked domina  |
| KAT6B   | POMT2    | COX7B   | X-linked domina  |
| RAD51   | CTSA     | WDR45   | X-linked domina  |
| SRCAP   | BBS9     | PCDH19  | X-linked over-do |
| KIF11   | ADSL     | EFNB1   | X-linked over-do |
| EFTUD2  | ATIC     |         |                  |
| ABCB6   | PC       |         |                  |
| COL4A2  | RBM28    |         |                  |
| COL4A1  | SLC12A6  |         |                  |
| EZH2    | SLC17A5  |         |                  |
| NRXN1   | SLC4A4   |         |                  |
| NRXN2   | SC5D     |         |                  |
| NRXN3   | SCO1     |         |                  |
| PRRT2   | SIL1     |         |                  |

|          |          |
|----------|----------|
| TAB2     | SOBP     |
| GJC2     | TUBA8    |
| KRT74    | TBCE     |
| PTHLH    | GTF2H5   |
| SMARCA4  | TRAPPC9  |
| KBTBD13  | TRIM32   |
| MAP3K1   | TTC8     |
| KLF1     | TUSC3    |
| WDR11    | UBR1     |
| NR5A1    | UMPS     |
| SPTLC2   | VLDLR    |
| NFIX     | WDR62    |
| CBL      | WNT10B   |
| KIF22    | WNT7A    |
| TSHZ1    | XPNPEP3  |
| CDON     | ZBTB16   |
| ANKRD11  | ZFYVE26  |
| SPECC1L  | HSPD1    |
| ARHGAP31 | LMNA     |
| ANKRD26  | ACBD6    |
| COL11A1  | ADK      |
| KCNMA1   | ADRA2B   |
| FGF10    | ASCC3    |
| ACVR1    | ASCL1    |
| ZNF750   | ARL14EP  |
| SHANK3   | C12orf57 |
| SOS1     | TTI2     |
| RNF135   | RABL6    |
| RAF1     | CACNA1G  |
| SPRED1   | CAPN10   |
| ACTA2    | CASP2    |
| FAM58A   | CCNA2    |
| AFG3L2   | CNKSR1   |
| TRPV4    | COQ5     |
| IRF6     | EEF1B2   |
| TEK      | ELP2     |
| THAP1    | ENTPD1   |
| SOX9     | ERLIN2   |
| SHOC2    | FASN     |
| THRA     | FRY      |
| TBX4     | GON4L    |
| KIF1A    | HIST1H4B |
| PRRX1    | HIST3H3  |
| IHH      | INPP4A   |
| SLC4A1   | KDM5A    |
| AMER1    | KDM6B    |
| ANKH     | KIF7     |
| ANO5     | LAMA1    |
| CHD7     | LARP7    |
| COL3A1   | LINS     |

|         |         |
|---------|---------|
| COL9A1  | MAN1B1  |
| COL9A2  | NDST1   |
| COL9A3  | PARP1   |
| COL10A1 | PECR    |
| COL11A2 | POLR3B  |
| COMP    | PRMT10  |
| DSPP    | PRRT2   |
| FLNB    | RALGDS  |
| FOXL2   | RGS7    |
| LDB3    | SCAPER  |
| LMX1B   | SLC31A1 |
| LRP5    | TAF2    |
| LEMD3   | TMEM135 |
| MATN3   | TRMT1   |
| MMP13   | UBR7    |
| MYH8    | WDR45B  |
| IKBKG   | ZBTB40  |
| ACAN    | ZCCHC8  |
| PTH1R   | ZNF526  |
| RUNX2   | ATM     |
| SIX1    | PALB2   |
| STAT1   | BRIP1   |
| TGFB1   | BUB1B   |
| COL4A3  | DDB2    |
| DFNA5   | ERCC4   |
| EDNRB   | NBN     |
| EYA4    | SBDS    |
| FGF9    | XPA     |
| GJB2    | XPC     |
| MYCN    | FANCG   |
| PAX3    | FANCF   |
| PTPN11  | FANCE   |
| SIX5    | FANCD2  |
| TECTA   | FANCC   |
| DYRK1A  | PMS2    |
| GABRB3  | FH      |
| PITX1   | BRCA2   |
| TFAP2A  | BLM     |
| WNT4    | TSHR    |
| ACVR2B  | CTC1    |
| ALX4    | PNPLA1  |
| ATP1A3  | RBM8A   |
| CFC1    | CEP41   |
| CHRN2   | MEGF10  |
| COL1A1  | CEP57   |
| CRELD1  | ORC1    |
| CRX     | ORC4    |
| ELN     | ORC6    |
| EMX2    | CDC6    |
| FBN2    | COLEC11 |

|        |          |
|--------|----------|
| FLT4   | MASP1    |
| FOXC2  | ACP5     |
| FOXP2  | CCDC39   |
| GABRA1 | CCDC40   |
| GFAP   | SDCCAG8  |
| GLI2   | NUBPL    |
| GLI3   | TMEM216  |
| GLUD1  | RAD51C   |
| HNF4A  | PNKP     |
| ITGA6  | FKBP14   |
| ITPR1  | AGK      |
| LEFTY2 | GPR179   |
| LHX4   | DDOST    |
| MSX1   | ENPP1    |
| MSX2   | ABCC6    |
| NKX2-1 | SLC33A1  |
| NODAL  | RIPK4    |
| NOTCH1 | C8orf37  |
| PAX9   | NRXN1    |
| PDHA1  | COX14    |
| RANBP2 | CHSY1    |
| ROR2   | IFT122   |
| RPS19  | HPSE2    |
| SALL4  | SERPINB6 |
| SCN1A  | POMP     |
| SCN2A  | PTPRQ    |
| SCN4A  | ITCH     |
| SIX3   | FLVCR2   |
| SMAD3  | TPRN     |
| SUMO1  | SLC52A3  |
| TBX1   | GRXCR1   |
| TBX3   | SH3PXD2B |
| TFAP2B | AIMP1    |
| TGFBR2 | PLEC     |
| TGIF1  | PSMB8    |
| TWIST1 | JAM3     |
| WNT5A  | FLVCR1   |
| ZIC2   | MED17    |
| KCNE1  | COL11A1  |
| BMP4   | SLC24A1  |
| POLR1D | BMPER    |
| GJA8   | SCARF2   |
| GDF3   | TBC1D24  |
| OTX2   | FAM161A  |
| PAX2   | WDR35    |
| PAX6   | PTPN14   |
| PITX3  | PDE6G    |
| SHH    | PVRL4    |
| MAF    | HSD17B4  |
| SOX10  | TWIST2   |

|         |           |
|---------|-----------|
| TCOF1   | C12orf65  |
| EXT2    | TMEM237   |
| PHOX2B  | ELOVL4    |
| CD96    | SMOC2     |
| GDF1    | WDR19     |
| SOX17   | POLR3A    |
| ZEB1    | NFU1      |
| NRAS    | BOLA3     |
| MAFB    | CSTA      |
| SCN8A   | ST3GAL3   |
| LOXHD1  | PXDN      |
| TRPV3   | KIF1A     |
| ARID1B  | IGFBP7    |
| PDE4D   | DOCK6     |
| ARID1A  | IL11      |
| SMARCE1 | CCDC8     |
| GUCY2C  | CUL7      |
| SHANK1  | BLOC1S6   |
| SF3B4   | FYCO1     |
| PLCB4   | NDE1      |
| GNAI3   | CLN6      |
| KANSL1  | IMPAD1    |
| RAD21   | FAM20A    |
| ABCC9   | BANF1     |
| PIK3R2  | LIPN      |
| TGFB2   | ILDR1     |
| PHF21A  | DHFR      |
| MBD5    | IHH       |
| NR1I3   | NEK1      |
| CARD14  | GJC2      |
| IFITM5  | CFL2      |
| MLL     | TNFRSF13B |
| CCDC78  | SECISBP2  |
| RBPJ    | SLC4A1    |
| DIP2B   | MMACHC    |
| YWHAE   | FLG       |
| KLF8    | SLC2A10   |
| ZFPM2   | MPV17     |
| SKI     | PLA2G6    |
| GATAD2B | SLC4A11   |
| PIEZO2  | DFNB59    |
| PLCG2   | SLC6A5    |
| KCNT1   | RNASEH2B  |
| PACS1   | RNASEH2C  |
| CHD8    | RNASEH2A  |
| TBR1    | TREX1     |
| TBL1XR1 | ATP13A2   |
| SNRPE   | SEC23A    |
| AUTS2   | RSPO4     |
| STIM1   | DMP1      |

|         |          |
|---------|----------|
| TCF12   | PLCE1    |
| ERF     | PNPLA2   |
| KCTD1   | SYNE1    |
| DEPDC5  | HAX1     |
| TUBB4A  | LEPRE1   |
| PRKAR1A | SPG11    |
| KIF5C   | EOMES    |
| KIF2A   | IFT80    |
| BICD2   | LRP2     |
| FAM111A | GLIS2    |
| PDGFRB  | GLE1     |
| CHD2    | PCNT     |
| SCN1B   | AK2      |
| POLD1   | TBXAS1   |
| DSTYK   | TMPRSS6  |
| CACNA1A | HPGD     |
| GRIN1   | MYO5B    |
| HNRNPU  | TMEM70   |
| MTOR    | LRTOMT   |
| NEDD4L  | TAC3     |
| CTNNB1  | TACR3    |
| MTF1    | SLC25A38 |
| ZMYM6   | SDHAF1   |
| MYT1L   | RNASET2  |
| PHIP    | TACO1    |
| WAC     | SEC23B   |
| ASH1L   | PYCR1    |
| CAMTA1  | FAM134B  |
| CACNA1C | VIPAS39  |
| GNAO1   | ARSB     |
| VIP     | OBSL1    |
| CAPRIN1 | GLB1     |
| CTCF    | GUSB     |
| PIK3R1  | CTSD     |
| RIT1    | CLN3     |
| TM4SF20 | CLN5     |
| RARB    | NAGLU    |
| SMAD2   | CTNS     |
| NAA15   | FUCA1    |
| SCN11A  | GALNS    |
| C6orf70 | GBA      |
| QKI     | GNS      |
| PTDSS1  | HEXA     |
| LRP2    | HEXB     |
| GRHL3   | HGSNAT   |
| PUF60   | HYAL1    |
| SCRIB   | PEX12    |
| EEF1A2  | PEX14    |
| CLCN4   | PEX16    |
| KCNH5   | PEX19    |

DNM1  
SNRPB  
YAP1  
NR2F1  
EDN1  
RRAS  
MAB21L2  
NR2F2  
SETD5  
TUBB2A  
AHDC1  
IFIH1  
ADNP  
DNMT3A  
CCND2  
HCN1  
ZSWIM6  
ZBTB20  
ASXL3  
SOX11  
ZNF713  
CACNA1D  
NOTCH3  
COL4A3BP  
PPP2R5D  
POGZ  
PPP2R1A  
DDX3X  
BCL11A  
PURA  
TRIO  
PCGF2  
NFIA  
TGFB3  
KCNH1  
ALDH18A1  
CHAMP1  
SHOX

PEX3  
PEX6  
PPT1  
GM2A  
SGSH  
TPP1  
ALG12  
ANO5  
NPR2  
CHST3  
COL9A1  
COL11A2  
DDR2  
DOCK8  
FREM1  
RAB18  
RAB3GAP1  
DYNC2H1  
EVC  
FZD6  
GPC6  
IFT43  
EVC2  
LBR  
LRP5  
MMP13  
NKX3-2  
NPHP1  
NPHP3  
NPHP4  
PAPSS2  
HSPG2  
ACAN  
PTH1R  
SLC26A2  
SLC35D1  
SLC39A13  
STAT1  
TTN  
TRIP11  
AFG3L2  
FLNB  
ALDH5A1  
AUH  
BCS1L  
BTD  
DDC  
ETFA  
ETFB  
ETFDH

FAH  
LMBRD1  
MAT1A  
MCEE  
MMAA  
MMAB  
MUT  
OXCT1  
PSAP  
VDR  
RYR1  
ADCK3  
UGT1A1  
ALMS1  
ATP6V1B1  
BSND  
CD151  
CDH23  
CISD2  
CLCNKA  
CLCNKB  
CLDN14  
COL4A3  
COL4A4  
ESPN  
ESRRB  
FGF3  
GJB2  
GJB6  
GPSM2  
HGF  
KCNE1  
KCNQ1  
LHFPL5  
LHX3  
LOXHD1  
MARVELD2  
MGP  
MSRB3  
MYO15A  
MYO7A  
OTOA  
OTOF  
PLOD2  
PLOD3  
AP4B1  
AP4E1  
AP4S1  
CHRNA1  
CHST14

COQ9  
DPM3  
FOLR1  
FTO  
MRE11A  
NPHS1  
RAD50  
RFT1  
SLC27A4  
STIL  
VRK1  
WNT4  
AAAS  
AASS  
ABCB11  
ACADM  
ACADS  
ACADVL  
ACAT1  
ADA  
AGL  
AGXT  
AIRE  
ALAD  
ALDH7A1  
ALDOA  
ALDOB  
ALG1  
ALG11  
ALG2  
ALG3  
ALG6  
ALG8  
ALG9  
ALPL  
ALX4  
APTX  
ARFGEF2  
ARSA  
ASAH1  
ASL  
ASPA  
ASPM  
ASS1  
ATP8B1  
BCKDHA  
BCKDHB  
BIN1  
BMPR1B  
CDH3

CDK5RAP2  
CIRH1A  
CLCN7  
COG1  
COG4  
COG5  
COG7  
COG8  
COL18A1  
COQ2  
CSTB  
CTSK  
CYB5R3  
DARS2  
DBT  
DHCR24  
DLAT  
DLD  
DOLK  
DPAGT1  
DPM1  
ERCC1  
ETHE1  
FANCI  
FANCL  
FANCM  
FBP1  
FIG4  
FOXE1  
FOXN1  
GAA  
GALC  
GCDH  
GCSH  
GFM1  
GHR  
GLDC  
GPR56  
HADH  
HLCS  
HMGCL  
HMGCS2  
HPS1  
HR  
IGHMBP2  
ITGA7  
IVD  
JAK3  
KARS  
KCNJ11

LAMA2  
LRAT  
LRPPRC  
LYST  
MC2R  
MCCC1  
MCCC2  
MCOLN1  
MFSD8  
MLYCD  
MOCS1  
MOCS2  
MOGS  
MPDU1  
MPI  
NAGS  
NDUFAF2  
NDUFS1  
NDUFS4  
NDUFS7  
NDUFS8  
NDUFV1  
NEK8  
NHP2  
NOP10  
PDHX  
PDSS1  
PDSS2  
PKHD1  
PLCB1  
PLOD1  
PMM2  
POU1F1  
PROP1  
PTF1A  
PTH  
PTS  
PVRL1  
PYGL  
QDPR  
RARS2  
RELN  
ROBO3  
ROR2  
RPE65  
SAMHD1  
SCO2  
SDHA  
SLC19A3  
SLC22A5

SLC25A19  
SLC25A20  
SLC25A22  
SLC2A2  
SLC35A1  
SLC5A5  
SLC6A3  
SMARCAL1  
SPR  
SRD5A3  
ST3GAL5  
STAR  
SUCLG1  
SUMF1  
SURF1  
TCTN1  
TCTN2  
TH  
TK2  
TRIM37  
TSEN2  
TSEN34  
TSEN54  
TUFM  
TYR  
TYRP1  
UQCRB  
UQCRQ  
UROS  
VPS13B  
VPS33B  
WNT3  
WRAP53  
ZFP57  
ZMPSTE24  
CRYBB1  
CLDN19  
CC2D2A  
DHODH  
POLR1C  
HMX1  
TMEM67  
MFRP  
DDX11  
RPGRIP1L  
RAB3GAP2  
SMOC1  
VSX2  
FANCA  
CDT1

FOXRED1  
GRM6  
TRPM1  
ACY1  
ATOH7  
CAV1  
ERBB3  
FAM20C  
HIBCH  
LIG4  
MED23  
PIP5K1C  
PREPL  
RAB23  
SNAP29  
ST14  
TTC19  
MPLKIP  
ACAD9  
SLX4  
C2orf71  
ACO2  
PIGL  
TTC37  
SKIV2L  
C5orf42  
ROGDI  
RNF168  
DNAAF3  
COL9A2  
NSUN2  
IFT140  
CEP135  
GUCY2C  
ISPD  
UVSSA  
EXOSC3  
IRX5  
CCDC103  
LRBA  
MTO1  
TMEM165  
PIGO  
HOXB1  
POC1A  
TCTN3  
RFX6  
ITGA3  
NMNAT1  
PDE6H

RTTN  
GTDC2  
GRM1  
C4orf26  
MMP14  
CRB1  
RPGRIP1  
AIPL1  
KIAA0226  
DNMT3B  
LRIG2  
EPG5  
UBE3B  
DIS3L2  
DLX5  
BRAT1  
CRADD  
TUBGCP6  
SNIP1  
HARS  
CABP2  
HYDIN  
HEATR2  
RMND1  
HINT1  
ABCD4  
OTOGL  
MEGF8  
HOXC13  
PNPT1  
LRRC6  
CHMP1A  
CIB2  
CRYAA  
CLPP  
DDHD1  
CYP2U1  
TECPR2  
DDHD2  
DHTKD1  
EXPH5  
TMEM5  
LRIT3  
CCDC114  
INPPL1  
ECEL1  
MEOX1  
ADAMTS18  
GBA2  
ALDH1A3

SLC24A4  
B3GALNT2  
TMCO1  
NPHS2  
DRC1  
WNT1  
PGAP2  
EOGT  
LARS2  
CEP63  
STAMBP  
DARS  
ANTXR1  
PIGN  
NDNL2  
SPRTN  
PSAT1  
B3GALT6  
PCCA  
PCCB  
PCBD1  
NPC1  
NPC2  
NT5C3A  
PHGDH  
PSPH  
AMT  
MTRR  
LAMC3  
DGAT1  
TTC7A  
DYX1C1  
AMPD2  
RSPH1  
DDX59  
SZT2  
WDR60  
FBXL4  
DSG1  
KLHL40  
GMPPB  
PIK3R1  
TRAPPC11  
ELAC2  
LRPAP1  
ZMYND10  
ARMC4  
CYC1  
RARB  
GMPPA

NALCN  
SPAG1  
C21orf59  
CCDC65  
TECTA  
DCHS1  
FAT4  
BRCA1  
COASY  
CSPP1  
KPTN  
PCYT1A  
EIF4A3  
IFT172  
WDR34  
PHC1  
DNA2  
SACS  
EDN1  
PGM3  
MAB21L2  
CEP83  
DOCK7  
PET100  
ERCC6L2  
PGAP3  
ITGA8  
XYLT1  
CA5A  
QARS  
ASPH  
SLC13A5  
MICU1  
CCNO  
NGLY1  
JAGN1  
SPEG  
POC1B  
C2CD3  
PTPRF  
CACNA1D  
RTEL1  
PRRX1  
FEZF1  
APOPT1  
GRHL2  
CCDC151  
CKAP2L  
STT3A  
STT3B

CLP1  
NEB  
PLK4  
PLXND1  
SNX14  
LAMB1  
FAR1  
SHOX  
RNU4ATAC





nt  
nt  
nt  
nt  
nt  
nt  
nt  
nt  
nt  
nt

minance  
minance
