# Supplementary material for: Pathogenicity and selective constraint on variation near splice sites
Source: HighWire-hosted journal article supplement (doi:10.1101/gr.238444.118), 2018-12-26
Supplement: Supplemental_code_and_data.zip [file DeNovo_variants_for_ROC_plots.xlsx]

## Sheet: IncCan
chr	pos	ref	alt	chr-pos-ref-alt	ann	gene	strand	context	mRate	VEP_CQ	DDg2P	Ada20th	RF20th	MES20th	Spi20th	CADD20th
2	39283845	T	C	2-39283845-T-C	don-2	SOS1	-	TTG	4.77525e-09	missense_variant	dominant	12	12	8	8	17
16	67199531	T	C	16-67199531-T-C	don-2	HSF4	+	ATG	1.20348e-08	missense_variant	dominant	13	14	20	18	18
2	149799272	C	A	2-149799272-C-A	don-2	KIF5C	+	ACA	2.53656e-09	missense_variant	dominant	14	15	13	12	19
6	157525128	C	T	6-157525128-C-T	don-2	ARID1B	+	CCA	6.04522e-09	stop_gained	dominant	15	14	9	2	20
3	41277332	C	T	3-41277332-C-T	don-2	CTNNB1	+	GCA	6.54839e-09	stop_gained	dominant	16	16	7	1	20
2	223160248	T	C	2-223160248-T-C	don-1	PAX3	-	CTG	6.39635e-09	splice_region_variant	dominant	17	20	5	4	15
3	71021701	C	T	3-71021701-C-T	don+5	FOXP1	-	ACG	1.22703e-07	splice_region_variant	dominant	11	10	3	4	14
10	94381235	G	T	10-94381235-G-T	don+5	KIF11	+	AGC	1.73684e-09	splice_region_variant	dominant	13	13	5	11	9
15	48737568	C	T	15-48737568-C-T	don+5	FBN1	-	ACT	8.78515e-09	splice_region_variant	dominant	15	16	4	2	14
9	130427615	G	C	9-130427615-G-C	don+5	STXBP1	+	AGT	2.65866e-09	splice_region_variant	dominant	15	16	7	5	13
22	41556731	G	A	22-41556731-G-A	don+5	EP300	+	AGT	8.76016e-09	splice_region_variant	dominant	16	19	2	1	13
6	157431700	G	A	6-157431700-G-A	don+5	ARID1B	+	CGT	1.24703e-07	splice_region_variant	dominant	17	20	4	2	11
17	42956919	C	T	17-42956919-C-T	don+5	EFTUD2	-	ACT	8.78515e-09	splice_region_variant	dominant	18	19	2	7	14
2	149221493	G	C	2-149221493-G-C	don+5	MBD5	+	TGT	2.4772e-09	splice_region_variant	dominant	18	20	3	6	12
2	166229861	A	G	2-166229861-A-G	don+4	SCN2A	+	AAG	4.59669e-09	splice_region_variant	dominant	14	14	6	3	13
9	130422391	A	G	9-130422391-A-G	don+4	STXBP1	+	GAG	3.58794e-09	splice_region_variant	dominant	16	19	4	3	14
6	157406041	T	C	6-157406041-T-C	don+2	ARID1B	+	GTA	6.49884e-09	splice_donor_variant	dominant	14	13	2	2	16
3	41278202	T	C	3-41278202-T-C	don+2	CTNNB1	+	GTA	6.49884e-09	splice_donor_variant	dominant	15	14	2	6	17
1	153785724	A	T	1-153785724-A-T	don+2	GATAD2B	-	TAC	1.17811e-09	splice_donor_variant	dominant	19	17	4	3	17
12	116549231	A	C	12-116549231-A-C	don+2	MED13L	-	TAC	1.35643e-09	splice_donor_variant	dominant	19	17	4	4	17
16	3801726	C	A	16-3801726-C-A	don+1	CREBBP	-	ACG	7.31389e-09	splice_donor_variant	dominant	18	18	3	1	18
17	44144914	C	T	17-44144914-C-T	don+1	KANSL1	-	ACG	1.22703e-07	splice_donor_variant	dominant	18	18	3	2	18
16	3801726	C	T	16-3801726-C-T	don+1	CREBBP	-	ACG	1.22703e-07	splice_donor_variant	dominant	18	18	4	1	17
8	118819455	C	G	8-118819455-C-G	don+1	EXT1	-	ACT	2.69621e-09	splice_donor_variant	dominant	19	17	1	3	17
17	42937272	C	T	17-42937272-C-T	don+1	EFTUD2	-	ACC	9.77035e-09	splice_donor_variant	dominant	19	17	3	1	19
18	31320408	G	A	18-31320408-G-A	don+1	ASXL3	+	GGT	9.82089e-09	splice_donor_variant	dominant	19	17	3	1	17
1	153788748	C	T	1-153788748-C-T	don+1	GATAD2B	-	ACC	9.77035e-09	splice_donor_variant	dominant	19	17	3	4	18
12	116420188	C	T	12-116420188-C-T	don+1	MED13L	-	ACC	9.77035e-09	splice_donor_variant	dominant	19	18	1	2	18
1	245022576	C	T	1-245022576-C-T	don+1	HNRNPU	-	ACC	9.77035e-09	splice_donor_variant	dominant	19	18	1	4	19
14	21883883	C	A	14-21883883-C-A	don+1	CHD8	-	ACC	4.69935e-09	splice_donor_variant	dominant	19	18	2	1	18
3	71037144	C	T	3-71037144-C-T	don+1	FOXP1	-	ACG	1.22703e-07	splice_donor_variant	dominant	19	18	3	1	18
13	111156612	G	T	13-111156612-G-T	don+1	COL4A2	+	GGT	4.59177e-09	splice_donor_variant	dominant	19	18	3	2	17
3	9506357	G	A	3-9506357-G-A	don+1	SETD5	+	GGT	9.82089e-09	splice_donor_variant	dominant	20	17	1	4	18
11	118367083	G	T	11-118367083-G-T	don+1	KMT2A	+	TGT	2.65724e-09	splice_donor_variant	dominant	20	17	2	5	17
3	41268844	G	T	3-41268844-G-T	don+1	CTNNB1	+	GGT	4.59177e-09	splice_donor_variant	dominant	20	17	3	4	17
3	71064699	C	G	3-71064699-C-G	don+1	FOXP1	-	ACT	2.69621e-09	splice_donor_variant	dominant	20	18	1	1	19
17	42956923	C	T	17-42956923-C-T	don+1	EFTUD2	-	ACC	9.77035e-09	splice_donor_variant	dominant	20	18	2	2	18
1	151384771	C	A	1-151384771-C-A	don+1	POGZ	-	ACC	4.69935e-09	splice_donor_variant	dominant	20	18	2	4	19
2	166165305	G	A	2-166165305-G-A	don+1	SCN2A	+	CGT	1.24703e-07	splice_donor_variant	dominant	20	18	3	1	17
18	52928696	C	A	18-52928696-C-A	don+1	TCF4	-	ACC	4.69935e-09	splice_donor_variant	dominant	20	19	2	2	18
9	2081995	C	T	9-2081995-C-T	don	SMARCA2	+	TCG	7.77258e-08	missense_variant	dominant	15	15	6	15	18
1	27094490	G	C	1-27094490-G-C	don	ARID1A	+	AGG	1.96864e-09	missense_variant	dominant	15	16	8	5	14
10	94409743	G	A	10-94409743-G-A	don	KIF11	+	CGG	9.10553e-08	splice_region_variant	dominant	17	16	3	7	7
3	12633207	C	A	3-12633207-C-A	don	RAF1	-	CCG	5.7849e-09	missense_variant	dominant	18	19	6	11	20
6	33400583	G	A	6-33400583-G-A	don	SYNGAP1	+	CGG	9.10553e-08	missense_variant	dominant	20	20	1	3	19
6	157431695	G	A	6-157431695-G-A	don	ARID1B	+	AGG	7.69841e-09	missense_variant	dominant	20	20	3	2	18
3	189456422	A	G	3-189456422-A-G	acc-9	TP63	+	TAT	1.11391e-08	intron_variant	dominant	2	4	20	13	2
5	88025173	A	C	5-88025173-A-C	acc-9	MEF2C	-	AAT	1.21347e-09	splice_region_variant	dominant	17	19	2	9	10
9	130988306	G	A	9-130988306-G-A	acc-8	DNM1	+	CGG	9.10553e-08	splice_region_variant	dominant	11	7	3	6	14
16	30745810	C	G	16-30745810-C-G	acc-7	SRCAP	+	TCC	2.08691e-09	splice_region_variant	dominant	11	12	6	5	9
3	41266439	T	G	3-41266439-T-G	acc-6	CTNNB1	+	TTT	1.65218e-09	splice_region_variant	dominant	14	14	4	17	7
16	29816431	G	A	16-29816431-G-A	acc-5	KIF22	+	CGC	8.73854e-08	splice_region_variant	dominant	8	7	13	6	10
17	38801875	T	C	17-38801875-T-C	acc-4	SMARCE1	-	GTT	5.6431e-09	splice_region_variant	dominant	14	14	6	6	8
9	140728798	C	G	9-140728798-C-G	acc-3	EHMT1	+	GCA	1.7005e-09	splice_region_variant	dominant	16	19	1	2	5
9	98231437	T	C	9-98231437-T-C	acc-2	PTCH1	-	CTG	6.39635e-09	splice_acceptor_variant	dominant	17	18	4	1	16
10	76784714	A	G	10-76784714-A-G	acc-2	KAT6B	+	CAG	6.40038e-09	splice_acceptor_variant	dominant	18	16	1	2	17
5	176673677	A	G	5-176673677-A-G	acc-2	NSD1	+	TAG	5.93918e-09	splice_acceptor_variant	dominant	18	16	2	2	15
11	118352428	A	C	11-118352428-A-C	acc-2	KMT2A	+	CAG	1.38947e-09	splice_acceptor_variant	dominant	18	18	3	3	16
3	9490070	A	C	3-9490070-A-C	acc-2	SETD5	+	TAG	1.01366e-09	splice_acceptor_variant	dominant	19	17	1	1	16
21	38865317	A	G	21-38865317-A-G	acc-2	DYRK1A	+	CAG	6.40038e-09	splice_acceptor_variant	dominant	19	17	2	1	17
10	28879647	A	G	10-28879647-A-G	acc-2	WAC	+	TAG	5.93918e-09	splice_acceptor_variant	dominant	19	17	3	3	17
22	41553171	A	G	22-41553171-A-G	acc-2	EP300	+	TAG	5.93918e-09	splice_acceptor_variant	dominant	19	17	4	5	17
11	119148874	A	T	11-119148874-A-T	acc-2	CBL	+	AAG	1.08152e-09	splice_acceptor_variant	dominant	19	19	1	1	17
17	42937415	T	C	17-42937415-T-C	acc-2	EFTUD2	-	CTG	6.39635e-09	splice_acceptor_variant	dominant	19	19	1	1	17
8	144900247	T	C	8-144900247-T-C	acc-2	PUF60	-	CTG	6.39635e-09	splice_acceptor_variant	dominant	20	17	3	5	16
11	118359327	A	C	11-118359327-A-C	acc-2	KMT2A	+	TAG	1.01366e-09	splice_acceptor_variant	dominant	20	18	2	1	17
3	4753429	C	T	3-4753429-C-T	acc-12	ITPR1	+	TCC	7.78453e-09	non_coding_exon_variant	dominant	3	4	16	18	7
22	24143120	T	G	22-24143120-T-G	acc-11	SMARCB1	+	GTA	1.45449e-09	intron_variant	dominant	12	12	7	3	7
18	52895603	T	C	18-52895603-T-C	acc-11	TCF4	-	ATT	7.34917e-09	intron_variant	dominant	15	15	5	8	7
21	38862476	G	T	21-38862476-G-T	acc-1	DYRK1A	+	AGT	1.95296e-09	splice_acceptor_variant	dominant	19	17	3	5	17
21	38862476	G	T	21-38862476-G-T	acc-1	DYRK1A	+	AGT	1.95296e-09	splice_acceptor_variant	dominant	19	17	3	5	17
1	245026033	C	T	1-245026033-C-T	acc-1	HNRNPU	-	CCT	7.64219e-09	splice_acceptor_variant	dominant	17	19	2	1	16
6	79724934	C	A	6-79724934-C-A	acc-1	PHIP	-	CCT	1.68749e-09	splice_acceptor_variant	dominant	18	15	1	1	18
6	157524999	G	A	6-157524999-G-A	acc-1	ARID1B	+	AGT	8.76016e-09	splice_acceptor_variant	dominant	19	18	2	1	18
22	41562602	G	C	22-41562602-G-C	acc-1	EP300	+	AGA	2.95543e-09	splice_acceptor_variant	dominant	20	17	1	2	18
18	52895593	C	T	18-52895593-C-T	acc-1	TCF4	-	TCT	5.41574e-09	splice_acceptor_variant	dominant	20	17	2	1	18
12	116404049	C	A	12-116404049-C-A	acc-1	MED13L	-	TCT	2.25033e-09	splice_acceptor_variant	dominant	20	18	2	1	19
18	52942984	C	T	18-52942984-C-T	acc-1	TCF4	-	TCT	5.41574e-09	splice_acceptor_variant	dominant	20	18	4	1	18
3	9495422	G	A	3-9495422-G-A	acc-1	SETD5	+	AGC	7.7065e-09	splice_acceptor_variant	dominant	20	19	2	2	18
1	120502124	C	A	1-120502124-C-A	acc+1	NOTCH2	-	CCC	2.65265e-09	splice_region_variant	dominant	3	3	19	15	10
5	61669515	G	T	5-61669515-G-T	acc+1	KIF2A	+	GGT	4.59177e-09	missense_variant	dominant	14	15	18	16	15
17	42957006	C	T	17-42957006-C-T	acc	EFTUD2	-	TCC	7.78453e-09	missense_variant	dominant	16	18	9	6	20
12	52180326	G	T	12-52180326-G-T	acc	SCN8A	+	GGT	4.59177e-09	missense_variant	dominant	17	20	6	5	19

## Sheet: NC
chr	pos	ref	alt	chr-pos-ref-alt	ann	gene	strand	context	mRate	VEP_CQ	DDg2P	Ada20th	RF20th	MES20th	Spi20th	CADD20th
6	157525128	C	T	6-157525128-C-T	don-2	ARID1B	+	CCA	6.04522e-09	stop_gained	dominant	18	16	8	1	20
3	41277332	C	T	3-41277332-C-T	don-2	CTNNB1	+	GCA	6.54839e-09	stop_gained	dominant	18	18	5	1	20
3	12633207	C	A	3-12633207-C-A	don	RAF1	-	CCG	5.7849e-09	missense_variant	dominant	20	19	3	10	20
17	42957006	C	T	17-42957006-C-T	acc	EFTUD2	-	TCC	7.78453e-09	missense_variant	dominant	18	19	7	5	20
2	149799272	C	A	2-149799272-C-A	don-2	KIF5C	+	ACA	2.53656e-09	missense_variant	dominant	16	17	12	11	19
12	52180326	G	T	12-52180326-G-T	acc	SCN8A	+	GGT	4.59177e-09	missense_variant	dominant	19	19	4	4	19
6	33400583	G	A	6-33400583-G-A	don	SYNGAP1	+	CGG	9.10553e-08	missense_variant	dominant	20	20	1	2	19
9	2081995	C	T	9-2081995-C-T	don	SMARCA2	+	TCG	7.77258e-08	missense_variant	dominant	17	17	4	14	18
16	67199531	T	C	16-67199531-T-C	don-2	HSF4	+	ATG	1.20348e-08	missense_variant	dominant	15	17	20	18	18
6	157431695	G	A	6-157431695-G-A	don	ARID1B	+	AGG	7.69841e-09	missense_variant	dominant	20	20	1	1	18
2	39283845	T	C	2-39283845-T-C	don-2	SOS1	-	TTG	4.77525e-09	missense_variant	dominant	15	15	7	7	17
5	61669515	G	T	5-61669515-G-T	acc+1	KIF2A	+	GGT	4.59177e-09	missense_variant	dominant	17	17	18	15	16
2	223160248	T	C	2-223160248-T-C	don-1	PAX3	-	CTG	6.39635e-09	splice_region_variant	dominant	20	20	2	3	15
9	130988306	G	A	9-130988306-G-A	acc-8	DNM1	+	CGG	9.10553e-08	splice_region_variant	dominant	13	8	1	5	15
15	48737568	C	T	15-48737568-C-T	don+5	FBN1	-	ACT	8.78515e-09	splice_region_variant	dominant	18	18	2	1	15
17	42956919	C	T	17-42956919-C-T	don+5	EFTUD2	-	ACT	8.78515e-09	splice_region_variant	dominant	20	19	1	6	15
1	27094490	G	C	1-27094490-G-C	don	ARID1A	+	AGG	1.96864e-09	missense_variant	dominant	18	18	7	4	14
9	130422391	A	G	9-130422391-A-G	don+4	STXBP1	+	GAG	3.58794e-09	splice_region_variant	dominant	19	19	1	2	14
3	71021701	C	T	3-71021701-C-T	don+5	FOXP1	-	ACG	1.22703e-07	splice_region_variant	dominant	13	11	1	3	14
22	41556731	G	A	22-41556731-G-A	don+5	EP300	+	AGT	8.76016e-09	splice_region_variant	dominant	19	19	1	1	14
9	130427615	G	C	9-130427615-G-C	don+5	STXBP1	+	AGT	2.65866e-09	splice_region_variant	dominant	18	18	5	4	14
2	166229861	A	G	2-166229861-A-G	don+4	SCN2A	+	AAG	4.59669e-09	splice_region_variant	dominant	16	16	3	2	14
2	149221493	G	C	2-149221493-G-C	don+5	MBD5	+	TGT	2.4772e-09	splice_region_variant	dominant	20	20	1	5	13
6	157431700	G	A	6-157431700-G-A	don+5	ARID1B	+	CGT	1.24703e-07	splice_region_variant	dominant	20	20	1	1	12
16	29816431	G	A	16-29816431-G-A	acc-5	KIF22	+	CGC	8.73854e-08	splice_region_variant	dominant	10	8	12	5	11
1	120502124	C	A	1-120502124-C-A	acc+1	NOTCH2	-	CCC	2.65265e-09	splice_region_variant	dominant	3	3	19	15	11
5	88025173	A	C	5-88025173-A-C	acc-9	MEF2C	-	AAT	1.21347e-09	splice_region_variant	dominant	19	19	1	8	10
16	30745810	C	G	16-30745810-C-G	acc-7	SRCAP	+	TCC	2.08691e-09	splice_region_variant	dominant	14	14	3	4	10
10	94381235	G	T	10-94381235-G-T	don+5	KIF11	+	AGC	1.73684e-09	splice_region_variant	dominant	15	16	3	10	9
17	38801875	T	C	17-38801875-T-C	acc-4	SMARCE1	-	GTT	5.6431e-09	splice_region_variant	dominant	17	16	3	5	8
10	94409743	G	A	10-94409743-G-A	don	KIF11	+	CGG	9.10553e-08	splice_region_variant	dominant	20	18	1	6	8
18	52895603	T	C	18-52895603-T-C	acc-11	TCF4	-	ATT	7.34917e-09	intron_variant	dominant	18	17	2	7	8
3	41266439	T	G	3-41266439-T-G	acc-6	CTNNB1	+	TTT	1.65218e-09	splice_region_variant	dominant	17	16	2	17	7
3	4753429	C	T	3-4753429-C-T	acc-12	ITPR1	+	TCC	7.78453e-09	non_coding_exon_variant	dominant	4	5	16	18	7
22	24143120	T	G	22-24143120-T-G	acc-11	SMARCB1	+	GTA	1.45449e-09	intron_variant	dominant	14	14	5	2	7
9	140728798	C	G	9-140728798-C-G	acc-3	EHMT1	+	GCA	1.7005e-09	splice_region_variant	dominant	19	19	1	1	6
3	189456422	A	G	3-189456422-A-G	acc-9	TP63	+	TAT	1.11391e-08	intron_variant	dominant	2	4	19	12	2

## Sheet: Summary_data_for_plots
Ada/RF_order	Ada_C	cumul	%	RF_C	cumul	%	Ada_NC	cumul	%	RF_NC	cumul	%	CADD_C	cumul	%	CADD_NC	cumul	%			Can	Bracket	score	value		NC	Bracket	score	value																				Bracket
1	0	83	100	0	83	100	0	37	100	0	37	100	0	83	100	0	37	100				1	Null	100			1	Null	100																				1
2	1	83	100	0	83	100	1	37	100	0	37	100	1	83	100	1	37	100				2	Null	95			2	Null	95																				2
3	2	82	98.7952	1	83	100	1	36	97.2973	1	37	100	0	82	98.7952	0	36	97.2973				3	Null	90			3	Null	90																				3
4	0	80	96.3855	2	82	98.7952	1	35	94.5946	1	36	97.2973	0	82	98.7952	0	36	97.2973				4	Null	85			4	Null	85																				4
5	0	80	96.3855	0	80	96.3855	0	34	91.8919	1	35	94.5946	1	82	98.7952	0	36	97.2973				5	Null	80			5	Null	80																				5
6	0	80	96.3855	0	80	96.3855	0	34	91.8919	0	34	91.8919	0	81	97.5904	1	36	97.2973				6	Null	75			6	Null	75																				6
7	0	80	96.3855	2	80	96.3855	0	34	91.8919	0	34	91.8919	5	81	97.5904	3	35	94.5946				7	Null	70			7	Null	70																				7
8	1	80	96.3855	0	78	93.9759	0	34	91.8919	2	34	91.8919	1	76	91.5663	3	32	86.4865				8	Null	65			8	Null	65																				8
9	0	79	95.1807	0	78	93.9759	0	34	91.8919	0	32	86.4865	2	75	90.3614	1	29	78.3784				9	Null	60			9	Null	60																				9
10	0	79	95.1807	1	78	93.9759	1	34	91.8919	0	32	86.4865	3	73	87.9518	2	28	75.6757				10	Null	55			10	Null	55																				10
11	3	79	95.1807	0	77	92.7711	0	33	89.1892	1	32	86.4865	1	70	84.3373	2	26	70.2703				11	Null	50			11	Null	50																				11
12	2	76	91.5663	3	77	92.7711	0	33	89.1892	0	31	83.7838	1	69	83.1325	1	24	64.8649				12	Null	45			12	Null	45																				12
13	2	74	89.1566	2	74	89.1566	2	33	89.1892	0	31	83.7838	3	68	81.9277	1	23	62.1622				13	Null	40			13	Null	40																				13
14	6	72	86.747	6	72	86.747	2	31	83.7838	2	31	83.7838	6	65	78.3133	6	22	59.4595				14	Null	35			14	Null	35																				14
15	7	66	79.5181	5	66	79.5181	3	29	78.3784	1	29	78.3784	3	59	71.0843	4	16	43.2432				15	Null	30			15	Null	30																				15
16	5	59	71.0843	7	61	73.494	2	26	70.2703	5	28	75.6757	6	56	67.4699	1	12	32.4324				16	Null	25			16	Null	25																				16
17	7	54	65.0602	18	54	65.0602	4	24	64.8649	5	23	62.1622	20	50	60.241	1	11	29.7297				17	Null	20			17	Null	20																				17
18	10	47	56.6265	19	36	43.3735	7	20	54.0541	5	18	48.6486	18	30	36.1446	3	10	27.027				18	Null	15			18	Null	15																				18
19	20	37	44.5783	11	17	20.4819	5	13	35.1351	8	13	35.1351	8	12	14.4578	3	7	18.9189				19	Null	10			19	Null	10																				19
20	17	17	20.4819	6	6	7.22892	8	8	21.6216	5	5	13.5135	4	4	4.81928	4	4	10.8108				20	Null	5			20	Null	5																				20
																						2	Ada	100			2	Ada	100
																						3	Ada	98.7952			3	Ada	97.2973
MES/Spi_order	MES_C	cumul	%	Spi_C	cumul	%	MES_NC	cumul	%	Spi_NC	cumul	%										4	Ada	96.3855			4	Ada	94.5946
20	2	83	100	0	83	100	1	37	100	0	37	100										5	Ada	96.3855			5	Ada	91.8919
19	1	81	97.5904	0	83	100	2	36	97.2973	0	37	100										6	Ada	96.3855			6	Ada	91.8919
18	1	80	96.3855	2	83	100	1	34	91.8919	2	37	100										7	Ada	96.3855			7	Ada	91.8919
17	0	79	95.1807	1	81	97.5904	0	33	89.1892	1	35	94.5946										8	Ada	96.3855			8	Ada	91.8919
16	1	79	95.1807	1	80	96.3855	1	33	89.1892	0	34	91.8919										9	Ada	95.1807			9	Ada	91.8919
15	0	78	93.9759	2	79	95.1807	0	32	86.4865	2	34	91.8919										10	Ada	95.1807			10	Ada	91.8919
14	0	78	93.9759	0	77	92.7711	0	32	86.4865	1	32	86.4865										11	Ada	95.1807			11	Ada	89.1892
13	2	78	93.9759	1	77	92.7711	0	32	86.4865	0	31	83.7838										12	Ada	91.5663			12	Ada	89.1892
12	0	76	91.5663	1	76	91.5663	2	32	86.4865	1	31	83.7838										13	Ada	89.1566			13	Ada	89.1892
11	0	76	91.5663	2	75	90.3614	0	30	81.0811	1	30	81.0811										14	Ada	86.747			14	Ada	83.7838
10	0	76	91.5663	0	73	87.9518	0	30	81.0811	2	29	78.3784										15	Ada	79.5181			15	Ada	78.3784
9	2	76	91.5663	1	73	87.9518	0	30	81.0811	0	27	72.973										16	Ada	71.0843			16	Ada	70.2703
8	2	74	89.1566	2	72	86.747	1	30	81.0811	1	27	72.973										17	Ada	65.0602			17	Ada	64.8649
7	3	72	86.747	2	70	84.3373	3	29	78.3784	2	26	70.2703										18	Ada	56.6265			18	Ada	54.0541
6	6	69	83.1325	6	68	81.9277	0	26	70.2703	2	24	64.8649										19	Ada	44.5783			19	Ada	35.1351
5	3	63	75.9036	9	62	74.6988	3	26	70.2703	5	22	59.4595										20	Ada	20.4819			20	Ada	21.6216
4	10	60	72.2892	8	53	63.8554	2	23	62.1622	4	17	45.9459										21	Ada	0			21	Ada	0
3	19	50	60.241	8	45	54.2169	5	21	56.7568	2	13	35.1351										1	RF	100			1	RF	100
2	18	31	37.3494	15	37	44.5783	4	16	43.2432	4	11	29.7297										2	RF	100			2	RF	100
1	13	13	15.6627	22	22	26.506	12	12	32.4324	7	7	18.9189										3	RF	100			3	RF	100
																						10	RF	93.9759			10	RF	86.4865
																						11	RF	92.7711			11	RF	86.4865
For plotting the AUCs:																						12	RF	92.7711			12	RF	83.7838
Bracket	Null	D_Ada_C	D_RF_C	D_MESPD_C	D_Spidex_C	D_CADD_C	D_Ada_NC	D_RF_NC	D_MESPD_NC	D_Spidex_NC	D_CADD_NC											13	RF	89.1566			13	RF	83.7838
1	100	100	100	100	100	100	100	100	100	100	100											14	RF	86.747			14	RF	83.7838
2	95	100	100	97.5904	100	100	100	100	97.2973	100	100											15	RF	79.5181			15	RF	78.3784
3	90	98.7952	100	96.3855	100	98.7952	97.2973	100	91.8919	100	97.2973											16	RF	73.494			16	RF	75.6757
4	85	96.3855	98.7952	95.1807	97.5904	98.7952	94.5946	97.2973	89.1892	94.5946	97.2973											17	RF	65.0602			17	RF	62.1622
5	80	96.3855	96.3855	95.1807	96.3855	98.7952	91.8919	94.5946	89.1892	91.8919	97.2973											18	RF	43.3735			18	RF	48.6486
6	75	96.3855	96.3855	93.9759	95.1807	97.5904	91.8919	91.8919	86.4865	91.8919	97.2973											19	RF	20.4819			19	RF	35.1351
7	70	96.3855	96.3855	93.9759	92.7711	97.5904	91.8919	91.8919	86.4865	86.4865	94.5946											20	RF	7.22892			20	RF	13.5135
8	65	96.3855	93.9759	93.9759	92.7711	91.5663	91.8919	91.8919	86.4865	83.7838	86.4865											21	RF	0			21	RF	0
9	60	95.1807	93.9759	91.5663	91.5663	90.3614	91.8919	86.4865	86.4865	83.7838	78.3784											1	MES	100			1	MES	100
10	55	95.1807	93.9759	91.5663	90.3614	87.9518	91.8919	86.4865	81.0811	81.0811	75.6757											2	MES	97.5904			2	MES	97.2973
11	50	95.1807	92.7711	91.5663	87.9518	84.3373	89.1892	86.4865	81.0811	78.3784	70.2703											3	MES	96.3855			3	MES	91.8919
12	45	91.5663	92.7711	91.5663	87.9518	83.1325	89.1892	83.7838	81.0811	72.973	64.8649											4	MES	95.1807			4	MES	89.1892
13	40	89.1566	89.1566	89.1566	86.747	81.9277	89.1892	83.7838	81.0811	72.973	62.1622											5	MES	95.1807			5	MES	89.1892
14	35	86.747	86.747	86.747	84.3373	78.3133	83.7838	83.7838	78.3784	70.2703	59.4595											6	MES	93.9759			6	MES	86.4865
15	30	79.5181	79.5181	83.1325	81.9277	71.0843	78.3784	78.3784	70.2703	64.8649	43.2432											7	MES	93.9759			7	MES	86.4865
16	25	71.0843	73.494	75.9036	74.6988	67.4699	70.2703	75.6757	70.2703	59.4595	32.4324											8	MES	93.9759			8	MES	86.4865
17	20	65.0602	65.0602	72.2892	63.8554	60.241	64.8649	62.1622	62.1622	45.9459	29.7297											9	MES	91.5663			9	MES	86.4865
18	15	56.6265	43.3735	60.241	54.2169	36.1446	54.0541	48.6486	56.7568	35.1351	27.027											10	MES	91.5663			10	MES	81.0811
19	10	44.5783	20.4819	37.3494	44.5783	14.4578	35.1351	35.1351	43.2432	29.7297	18.9189											11	MES	91.5663			11	MES	81.0811
20	5	20.4819	7.22892	15.6627	26.506	4.81928	21.6216	13.5135	32.4324	18.9189	10.8108											12	MES	91.5663			12	MES	81.0811
21	0	0	0	0	0	0	0	0	0	0	0											13	MES	89.1566			13	MES	81.0811
																						14	MES	86.747			14	MES	78.3784
																						15	MES	83.1325			15	MES	70.2703
																						16	MES	75.9036			16	MES	70.2703
																						17	MES	72.2892			17	MES	62.1622
																						18	MES	60.241			18	MES	56.7568
																						19	MES	37.3494			19	MES	43.2432
																						20	MES	15.6627			20	MES	32.4324
																						21	MES	0			21	MES	0
																						1	Spi	100			1	Spi	100
																						2	Spi	100			2	Spi	100
																						3	Spi	100			3	Spi	100
																						4	Spi	97.5904			4	Spi	94.5946
																						5	Spi	96.3855			5	Spi	91.8919
																						6	Spi	95.1807			6	Spi	91.8919
																						7	Spi	92.7711			7	Spi	86.4865
																						8	Spi	92.7711			8	Spi	83.7838
																						9	Spi	91.5663			9	Spi	83.7838
																						10	Spi	90.3614			10	Spi	81.0811
																						11	Spi	87.9518			11	Spi	78.3784
																						12	Spi	87.9518			12	Spi	72.973
																						13	Spi	86.747			13	Spi	72.973
																						14	Spi	84.3373			14	Spi	70.2703
																						15	Spi	81.9277			15	Spi	64.8649
																						16	Spi	74.6988			16	Spi	59.4595
																						17	Spi	63.8554			17	Spi	45.9459
																						18	Spi	54.2169			18	Spi	35.1351
																						19	Spi	44.5783			19	Spi	29.7297
																						20	Spi	26.506			20	Spi	18.9189
																						21	Spi	0			21	Spi	0
																						1	CADD	100			1	CADD	100
																						2	CADD	100			2	CADD	100
																						3	CADD	98.7952			3	CADD	97.2973
																						4	CADD	98.7952			4	CADD	97.2973
																						5	CADD	98.7952			5	CADD	97.2973
																						6	CADD	97.5904			6	CADD	97.2973
																						7	CADD	97.5904			7	CADD	94.5946
																						8	CADD	91.5663			8	CADD	86.4865
																						9	CADD	90.3614			9	CADD	78.3784
																						10	CADD	87.9518			10	CADD	75.6757
																						11	CADD	84.3373			11	CADD	70.2703
																						12	CADD	83.1325			12	CADD	64.8649
																						13	CADD	81.9277			13	CADD	62.1622
																						14	CADD	78.3133			14	CADD	59.4595
																						15	CADD	71.0843			15	CADD	43.2432
																						16	CADD	67.4699			16	CADD	32.4324
																						17	CADD	60.241			17	CADD	29.7297
																						18	CADD	36.1446			18	CADD	27.027
																						19	CADD	14.4578			19	CADD	18.9189
																						20	CADD	4.81928			20	CADD	10.8108
																						21	CADD	0			21	CADD	0
[truncated: 9 more columns]
